# Supplementary material
Source: Springer Nature journal article supplement (https://www.springermedizin.de/resource/supplementary/13063_2013_1916_MOESM3_ESM.pdf/9621466)
Supplement: MOESM3 [file 9621466]

Patients with asymptomatic hyperuricemia complicated by chronic kidney disease stage 3

Randomization through the dynamic allocation procedure using allocation factors (study site, gender, age, serum uric acid, proteinuria, and complication by diabetes mellitus)

Randomization  
N = 400, 1:1

Febuxostat group (N = 200)

10-mg tablet/day at weeks 1-4 after initiation  
20-mg tablet/day at weeks 5-8 after initiation  
40-mg tablet/day thereafter

Placebo group (N = 200)

10-mg tablet/day at weeks 1-4 after initiation  
20-mg tablet/day at weeks 5-8 after initiation  
40-mg tablet/day thereafter

Study drug administration for 108 weeks  
Primary endpoint: eGFR slope (mL/min/1.73 m<sup>2</sup>/year)
